# Supplementary material
Source: MDPI journal article supplement (https://www.mdpi.com/2073-4441/13/9/1231)
Supplement: s1 [file s1]

**Table 1.** The water parameters, major ion compositions,  $\delta^{34}\text{S}$ – $\text{SO}_4^{2-}$  values, SAR, Na%, RSC,  $[\text{TZ}^+ - \text{TZ}^-]/\text{TZ}^-$  of Chishui River.

| Sample | Type        | pH   | EC                      | T                  | DO                   | Na <sup>+</sup>        | K <sup>+</sup>         | Mg <sup>2+</sup>       | Ca <sup>2+</sup>       | F <sup>−</sup>         | Cl <sup>−</sup>        | NO <sub>3</sub> <sup>−</sup> | SO <sub>4</sub> <sup>2−</sup> | HCO <sub>3</sub> <sup>−</sup> | $\delta^{34}\text{S}$ | SAR  | Na%   | RSC  | $[\text{TZ}^+ - \text{TZ}^-]/\text{TZ}^-$ |
|--------|-------------|------|-------------------------|--------------------|----------------------|------------------------|------------------------|------------------------|------------------------|------------------------|------------------------|------------------------------|-------------------------------|-------------------------------|-----------------------|------|-------|------|-------------------------------------------|
|        |             |      | $\mu\text{S}/\text{cm}$ | $^{\circ}\text{C}$ | $\text{mg}/\text{L}$ | $\text{mmol}/\text{L}$       | $\text{mmol}/\text{L}$        | $\text{mmol}/\text{L}$        | ‰                     |      |       |      | %                                         |
| 1      | Tributaries | 8.22 | 353                     | 10.5               | 7.31                 | 0.15                   | 0.11                   | 0.36                   | 1.30                   | 0.006                  | 0.13                   | 0.21                         | 0.72                          | 1.71                          | −4.2                  | 0.11 | 4.08  | 1.60 | 1.7                                       |
| 2      | Tributaries | 8.72 | 361                     | 9.5                | 8.67                 | 0.32                   | 0.03                   | 0.30                   | 1.38                   | 0.006                  | 0.10                   | 0.25                         | 0.81                          | 1.81                          | −6.33                 | 0.25 | 8.66  | 1.56 | −1.8                                      |
| 3      | Tributaries | 8.71 | 436                     | 8.6                | 9.05                 | 0.22                   | 0.04                   | 0.39                   | 1.47                   | 0.004                  | 0.09                   | 0.28                         | 0.75                          | 2.14                          | 7.28                  | 0.16 | 5.42  | 1.58 | −1.2                                      |
| 4      | Main stream | 8.71 | 401                     | 11.1               | 7.82                 | 0.25                   | 0.04                   | 0.46                   | 1.74                   | 0.007                  | 0.06                   | 0.19                         | 1.35                          | 1.47                          | −7.79                 | 0.17 | 5.25  | 2.94 | 6.1                                       |
| 5      | Main stream | 8.87 | 425                     | 10.1               | 8.58                 | 0.21                   | 0.04                   | 0.40                   | 1.51                   | 0.005                  | 0.08                   | 0.26                         | 0.91                          | 1.97                          | −2.2                  | 0.15 | 5.08  | 1.86 | −1.2                                      |
| 6      | Tributaries | 8.33 | 423                     | 9.2                | 7.73                 | 0.33                   | 0.08                   | 0.48                   | 1.51                   | 0.005                  | 0.16                   | 0.25                         | 0.77                          | 2.40                          | 3.66                  | 0.23 | 7.50  | 1.57 | 0.2                                       |
| 7      | Tributaries | 8.46 | 360                     | 8.9                | 8.85                 | 0.19                   | 0.04                   | 0.41                   | 1.38                   | 0.005                  | 0.10                   | 0.17                         | 0.65                          | 2.26                          | 2.49                  | 0.14 | 5.01  | 1.32 | −0.9                                      |
| 8      | Main stream | 8.46 | 392                     | 9.8                | 8.96                 | 0.20                   | 0.04                   | 0.39                   | 1.53                   | 0.005                  | 0.11                   | 0.24                         | 0.79                          | 2.12                          | −2.33                 | 0.15 | 4.92  | 1.72 | 0.8                                       |
| 9      | Main stream | 8.51 | 421                     | 10.0               | 8.41                 | 0.15                   | 0.03                   | 0.34                   | 1.79                   | 0.007                  | 0.09                   | 0.26                         | 0.90                          | 2.31                          | −7.11                 | 0.10 | 3.39  | 1.94 | −0.8                                      |
| 10     | Main stream | 8.50 | 387                     | 9.9                | —                    | 0.20                   | 0.05                   | 0.40                   | 1.49                   | 0.005                  | 0.11                   | 0.25                         | 0.77                          | 2.06                          | −1.08                 | 0.15 | 5.09  | 1.71 | 1.3                                       |
| 11     | Main stream | 8.46 | 423                     | 9.8                | 8.61                 | 0.18                   | 0.04                   | 0.47                   | 1.65                   | 0.007                  | 0.13                   | 0.07                         | 0.91                          | 2.32                          | 0.35                  | 0.12 | 4.03  | 1.91 | 2.2                                       |
| 12     | Main stream | 8.61 | —                       | 9.9                | —                    | 0.18                   | 0.03                   | 0.61                   | 1.80                   | —                      | 0.08                   | 0.13                         | 0.95                          | 2.86                          | —                     | 0.12 | 3.58  | 1.96 | 1.2                                       |
| 13     | Main stream | 8.64 | 424                     | 11.0               | 9.35                 | 0.06                   | 0.03                   | 0.90                   | 1.39                   | 0.007                  | 0.05                   | 0.10                         | 0.74                          | 3.09                          | 14                    | 0.04 | 1.27  | 1.49 | −1.6                                      |
| 14     | Tributaries | 7.75 | 738                     | 12.0               | 7.77                 | 0.75                   | 0.19                   | 1.56                   | 2.23                   | 0.016                  | 0.53                   | 0.02                         | 1.11                          | 5.49                          | 22.13                 | 0.39 | 8.83  | 2.09 | 3.1                                       |
| 15     | Main stream | 8.32 | 470                     | 10.1               | 8.26                 | 0.19                   | 0.05                   | 0.58                   | 1.70                   | 0.007                  | 0.13                   | 0.20                         | 0.92                          | 2.61                          | 3.49                  | 0.13 | 4.05  | 1.95 | −0.1                                      |
| 16     | Main stream | 8.45 | —                       | —                  | —                    | 0.22                   | 0.05                   | 0.60                   | 1.74                   | —                      | 0.14                   | 0.20                         | 0.95                          | 2.60                          | —                     | 0.14 | 4.44  | 2.08 | 2.3                                       |
| 17     | Tributaries | 8.48 | 545                     | 10.2               | —                    | 0.41                   | 0.06                   | 0.73                   | 2.30                   | 0.012                  | 0.39                   | 0.17                         | 1.45                          | 2.81                          | 17.07                 | 0.24 | 6.35  | 3.25 | 4.1                                       |
| 18     | Main stream | 8.27 | 467                     | 10.4               | 6.85                 | 0.32                   | 0.06                   | 0.66                   | 1.93                   | 0.008                  | 0.16                   | 0.19                         | 0.99                          | 2.68                          | 4.0                   | 0.20 | 5.80  | 2.51 | 10.9                                      |
| 19     | Tributaries | 8.71 | 495                     | 13.1               | 8.5                  | 0.32                   | 0.06                   | 0.64                   | 2.05                   | 0.009                  | 0.22                   | 0.24                         | 1.09                          | 2.70                          | 6.23                  | 0.19 | 5.47  | 2.70 | 7.8                                       |
| 20     | Main stream | 8.39 | 480                     | 10.9               | 8.35                 | 0.31                   | 0.06                   | 0.62                   | 1.85                   | 0.009                  | 0.18                   | 0.18                         | 1.02                          | 2.85                          | 4.43                  | 0.20 | 5.92  | 2.09 | 1.0                                       |
| 21     | Tributaries | 7.99 | 651                     | 12.5               | 8.03                 | 0.63                   | 0.06                   | 0.47                   | 2.79                   | 0.013                  | 0.37                   | 0.21                         | 2.64                          | 1.27                          | 5.85                  | 0.35 | 8.73  | 5.26 | 1.2                                       |
| 22     | Tributaries | 8.75 | 324                     | 10.9               | 8.34                 | 0.24                   | 0.03                   | 0.26                   | 1.30                   | 0.007                  | 0.15                   | 0.13                         | 0.65                          | 1.75                          | 3.73                  | 0.19 | 7.07  | 1.37 | 1.7                                       |
| 23     | Main stream | 7.90 | 480                     | 11.5               | —                    | 0.40                   | 0.06                   | 0.61                   | 1.96                   | 0.009                  | 0.21                   | 0.22                         | 1.12                          | 2.68                          | 5.71                  | 0.25 | 7.15  | 2.46 | 4.4                                       |
| 24     | Tributaries | 8.28 | 274                     | 9.8                | 8.68                 | 0.28                   | 0.04                   | 0.14                   | 1.08                   | 0.004                  | 0.16                   | 0.07                         | 0.33                          | 1.95                          | 6.06                  | 0.26 | 10.25 | 0.49 | −2.9                                      |
| 25     | Tributaries | 8.27 | 280                     | 10.0               | 8.61                 | 0.24                   | 0.03                   | 0.26                   | 1.11                   | 0.004                  | 0.08                   | 0.15                         | 0.59                          | 1.56                          | 7.82                  | 0.20 | 7.87  | 1.18 | 1.0                                       |
| 26     | Tributaries | 8.23 | 276                     | —                  | 8.63                 | 0.23                   | 0.03                   | 0.17                   | 1.10                   | 0.004                  | 0.11                   | 0.09                         | 0.40                          | 1.80                          | 6.64                  | 0.21 | 8.34  | 0.75 | 0.6                                       |
| 27     | Main stream | 8.16 | 466                     | 11.3               | 8.28                 | 0.33                   | 0.06                   | 0.58                   | 1.86                   | 0.009                  | 0.19                   | 0.20                         | 1.04                          | 2.53                          | 5.31                  | 0.21 | 6.31  | 2.36 | 5.2                                       |
| 28     | Tributaries | 8.35 | 128                     | 11.0               | 0.4                  | 0.12                   | 0.02                   | 0.08                   | 0.44                   | 0.002                  | 0.04                   | 0.16                         | 0.20                          | 0.52                          | 5.05                  | 0.16 | 9.90  | 0.53 | 5.8                                       |

| Sample | Type        | pH   | EC    | T    | DO   | Na <sup>+</sup> | K <sup>+</sup> | Mg <sup>2+</sup> | Ca <sup>2+</sup> | F <sup>-</sup> | Cl <sup>-</sup> | NO <sub>3</sub> <sup>-</sup> | SO <sub>4</sub> <sup>2-</sup> | HCO <sub>3</sub> <sup>-</sup> | δ <sup>34</sup> S | SAR  | Na%   | RSC  | [TZ <sup>+</sup> -TZ <sup>-</sup> ]/TZ <sup>-</sup> |
|--------|-------------|------|-------|------|------|-----------------|----------------|------------------|------------------|----------------|-----------------|------------------------------|-------------------------------|-------------------------------|-------------------|------|-------|------|-----------------------------------------------------|
|        |             |      | μS/cm | °C   | mg/L | mmol/L          | mmol/L         | mmol/L           | mmol/L           | mmol/L         | mmol/L          | mmol/L                       | mmol/L                        | mmol/L                        | ‰                 |      |       |      | %                                                   |
| 29     | Main stream | 8.24 | 428   | 11.4 | 8.71 | 0.34            | 0.06           | 0.51             | 1.67             | 0.008          | 0.18            | 0.19                         | 0.95                          | 2.25                          | 4.59              | 0.23 | 7.06  | 2.11 | 4.8                                                 |
| 30     | Tributaries | 8.09 | 139   | 10.6 | 9.38 | 0.14            | 0.02           | 0.09             | 0.48             | 0.003          | 0.05            | 0.18                         | 0.21                          | 0.65                          | 4.58              | 0.19 | 10.77 | 0.49 | 0.5                                                 |
| 31     | Main stream | 8.35 | 400   | 11.4 | 8.81 | 0.30            | 0.05           | 0.46             | 1.55             | 0.000          | 0.05            | 0.75                         | 0.67                          | 2.10                          | 4.59              | 0.21 | 6.90  | 1.93 | 3.7                                                 |
| 32     | Main stream | 8.37 | 413   | 9.5  | 8.73 | 0.30            | 0.05           | 0.46             | 1.52             | 0.011          | 0.50            | 0.38                         | 0.57                          | 2.15                          | 4.8               | 0.21 | 7.00  | 1.82 | 3.4                                                 |
| 33     | Tributaries | 8.16 | 271   | 10.1 | 8.63 | 0.23            | 0.03           | 0.21             | 1.02             | 0.005          | 0.10            | 0.09                         | 0.62                          | 1.54                          | 7.3               | 0.20 | 8.32  | 0.93 | -8.3                                                |
| 34     | Changjiang  | 8.09 | 402   | 12.5 | 8.28 | 0.78            | 0.05           | 0.51             | 1.13             | 0.010          | 0.55            | 0.004                        | 0.68                          | 2.49                          | 7.52              | 0.61 | 19.02 | 0.79 | -6.7                                                |
| 35     | Main stream | 8.20 | 381   | 14.2 | 8.56 | 0.27            | 0.05           | 0.42             | 1.41             | 0.008          | 0.20            | 0.11                         | 0.96                          | 1.99                          | 5.18              | 0.20 | 6.74  | 1.67 | -5.8                                                |
| 36     | Changjiang  | 7.63 | 436   | 14.7 | 6.88 | 0.74            | 0.07           | 0.51             | 1.19             | 0.010          | 0.52            | 0.002                        | 0.54                          | 2.38                          | 7.63              | 0.57 | 17.62 | 1.02 | 5.6                                                 |
| 37     | Tributaries | 8.24 | 284   | 11.7 | 9.14 | 0.23            | 0.03           | 0.25             | 1.09             | 0.006          | 0.11            | 0.10                         | 0.49                          | 1.59                          | 7.59              | 0.20 | 7.91  | 1.10 | 5.9                                                 |
| 38     | Tributaries | 8.45 | 482   | 9.6  | 8.83 | 0.23            | 0.05           | 0.78             | 1.86             | 0.008          | 0.10            | 0.42                         | 1.20                          | 2.73                          | 14.26             | 0.14 | 4.20  | 2.55 | -1.9                                                |
